# Supplementary material
Source: PubMed Central journal article supplement (PMC10527165)
Supplement: NIHMS1906211-supplement-1.pdf [file NIHMS1906211-supplement-1.pdf]

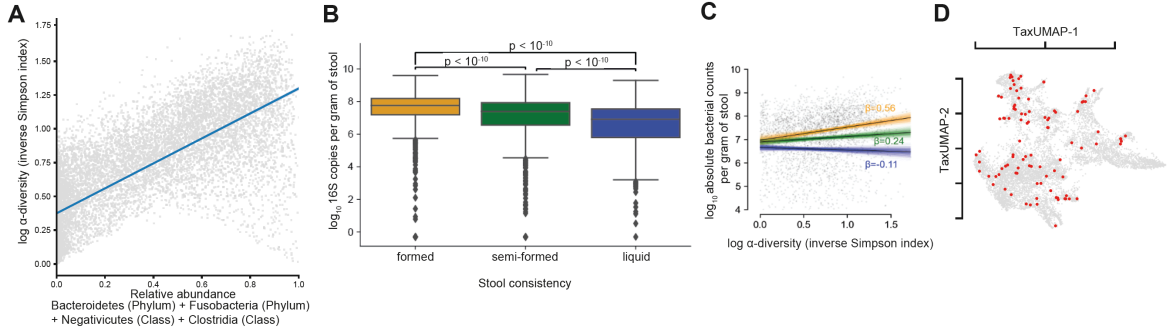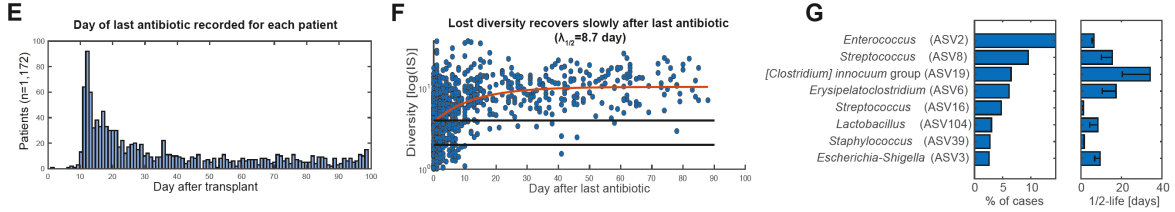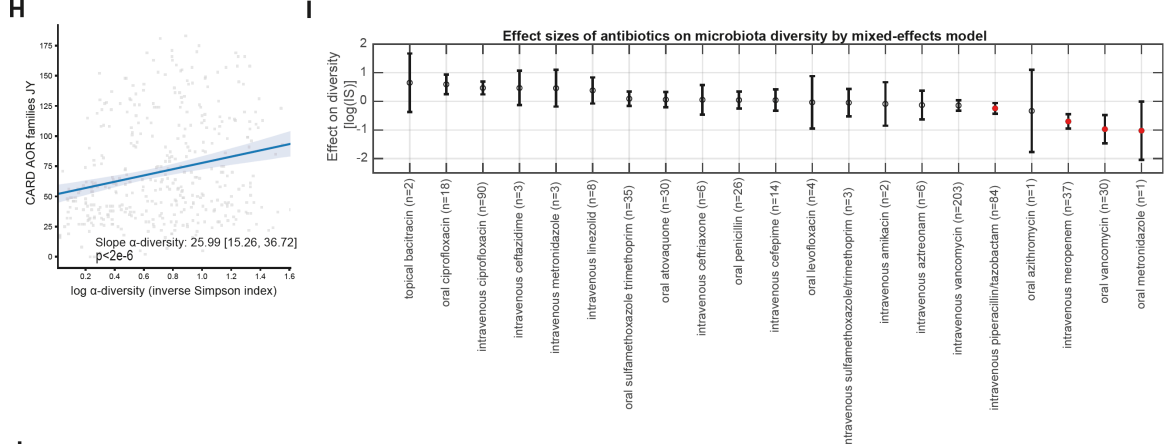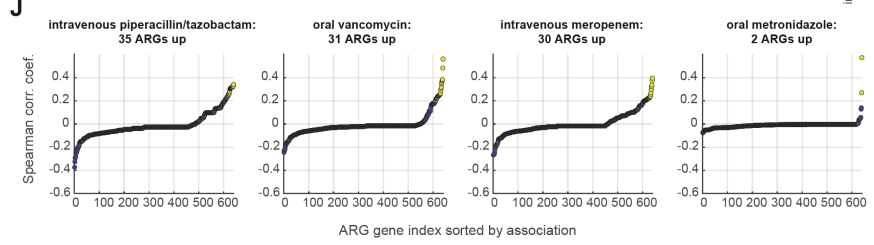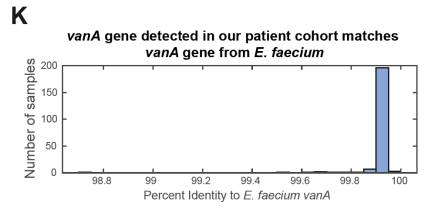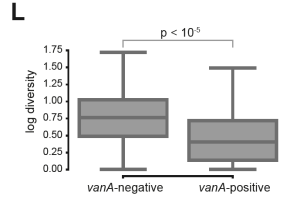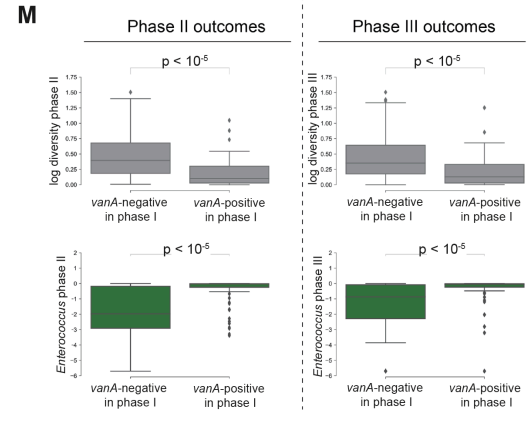

**Figure S1. The effect of antibiotics on persistence of dominations and relationship between bacterial diversity, density, stool consistency and presence of antimicrobial resistance genes. Related to Figure 2.** A) Log-diversity of the bacterial microbiota is positively correlated with the summed relative abundances of obligate anaerobe taxa. Blue: regression line with 95% CI from a linear model, slope: 0.92,  $p < 10^{-4}$ . B) Liquid and semi-formed stool samples have significantly lower bacterial densities than found in formed stool ( $p < 10^{-10}$ ; two-sided t-tests). C) Formed and semi-formed stool samples show a positive relationship between diversity and total bacterial counts, whereas a negative relationship is found in liquid stool samples; 1,000 regression lines sampled from the joint posterior for formed (orange), semi-formed (green) and liquid (blue) stool samples, and corresponding posterior regression line means (black lines, beta: slope values) from a Bayesian mixed effects model with random intercepts and slopes per consistency category. D) Start locations of volatile switches (volatility  $\geq 0.9$ ) are found across the TaxUMAP. E) Percentage of patients that received their last antibiotic on the specific day relative to the day of transplant indicated on the x-axis; N=1,172 patients. F) The microbiome diversity ( $\log_{10}$  of the inverse Simpson index) tends to stay low even after the last antibiotic administration. An exponential decay model (orange line, N=853 samples) reveals the average diversity recovers slowly, towards a plateau at approximately 10 (95% CI between 9.7 and 11.2). This model also determines that the half-life for diversity recovery is 9 days (with a 95% confidence interval of 6 to 14 days). G) Half-life for each of the eight most prevalent dominating states varies highly. The plot on the left represents the percentage of cases with one of the top eight domination states. The plot on the right represents domination half-life calculated by a linear mixed-effects model, and its lower bounds. IS: inverse Simpson index; ASV: amplicon sequence variant. H) More diverse samples harbor more unique antimicrobial resistance phenotypes (blue: regression line from a linear model with 95% CI,  $p < 10^{-5}$ ). I) The association coefficients between antibiotic treatments on bacterial diversity ( $\log_{10}$  of the inverse Simpson index) as estimated by a linear mixed-effects model; circles: maximum likelihood estimate, error bars: 95% CI. The analysis revealed four antibiotics as significantly associated with the loss of bacterial diversity (marked in red intravenous piperacillin/tazobactam, intravenous meropenem, oral vancomycin and oral metronidazole). (Sample size N for each treatment stated in

parenthesis next to the name of the antibiotic,  $p < 0.05$ , linear mixed-effects model). J) Administration of these four antibiotics associated with the loss of bacterial diversity leads to an increase in a subset of the total range of ARGs. X axis represents ARG gene index sorted by the association strength and y axis represents Spearman correlation coefficient between ARG and diversity. Marked in yellow are the ARG genes whose number rises upon administration of each of the four antibiotics. (N=640 ARG genes,  $p < 0.05$  after multiple hypothesis testing, Spearman correlation). IS: inverse Simpson index; ARG: antibiotic resistance gene; CI: confidence interval. K) *vanA* gene detected in our patient cohort matches the *vanA* gene from *E. faecium*. L) Diversity in samples corresponding to positive *vanA* detection in PCRs from rectal swabs is significantly lower ( $p < 10^{-5}$ , Wilcoxon rank sum test, first sample per *vanA* status and per patient if multiple samples available, *vanA* negative: n=508, *vanA* positive: n=195). M) Positive *vanA* rectal swabs during phase I predict more severe loss of diversity in phases II and III, and higher *Enterococcus* abundances in phases II and III; if multiple samples per patient and clinical phase were available, the minimum observed diversity and maximum observed *Enterococcus* abundances were chosen in patients of either *vanA* group. P values from Wilcoxon rank sum tests; *vanA* negative in phase I: n=644, *vanA* positive in Phase I: N=85.

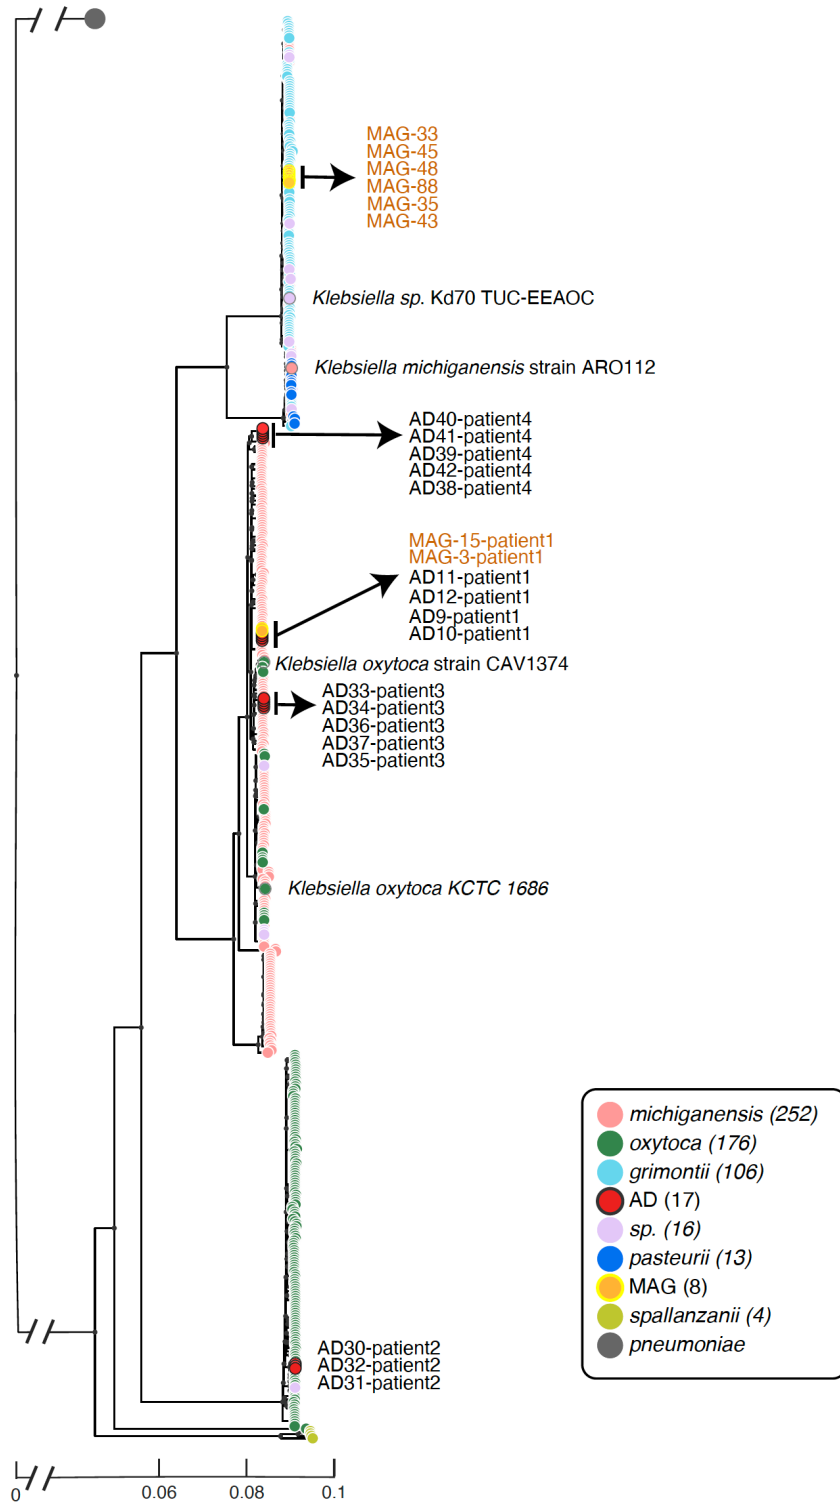

**Figure S2. Phylogenetic tree representing the relationship between ASV-36-*Klebsiella* isolates and other publicly available *Klebsiella* genomes. Related to Figure 4. The tree was built using genomes deposited at NCBI database whose 16S rRNA gene matched the**

16S sequence of ASV-36-*Klebsiella* exactly, 8 MAGs constructed from our patients' samples and the genomes of ASV-36 closest neighbors (*i.e.* *K. oxytoca* CAV1374 and *K. oxytoca* KCTC1686) and the genome of *K. michiganensis* ARO112. The tree was rooted with a genome of the pathobiont *K. pneumoniae subsp. pneumoniae* HS1128 strain. Colors correspond to taxonomic classification at the level of species.

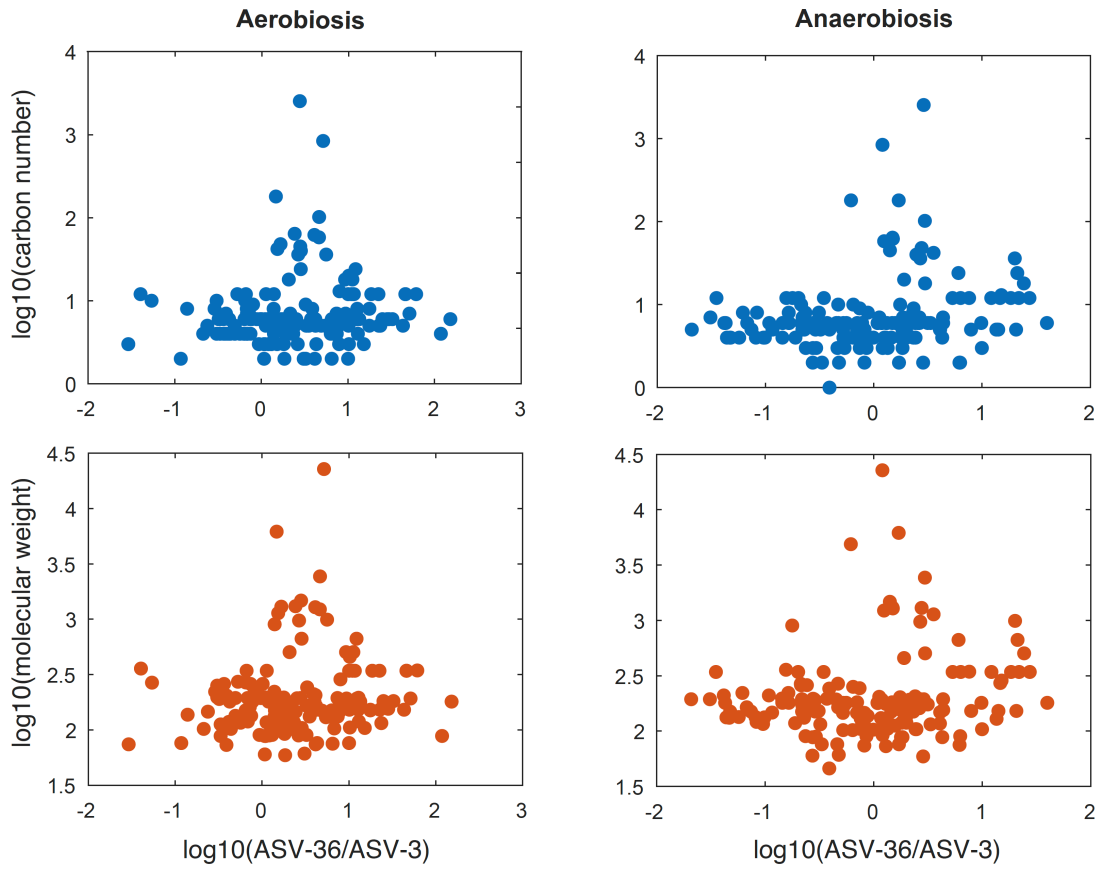

**Figure S3. Correlation between ASV-36 to ASV-3 ratio, obtained after growth in anaerobic and aerobic conditions, and molecular weight and carbon numbers of carbon sources from BIOLOG PM1 and PM2A plates. Related to Figure 5.**

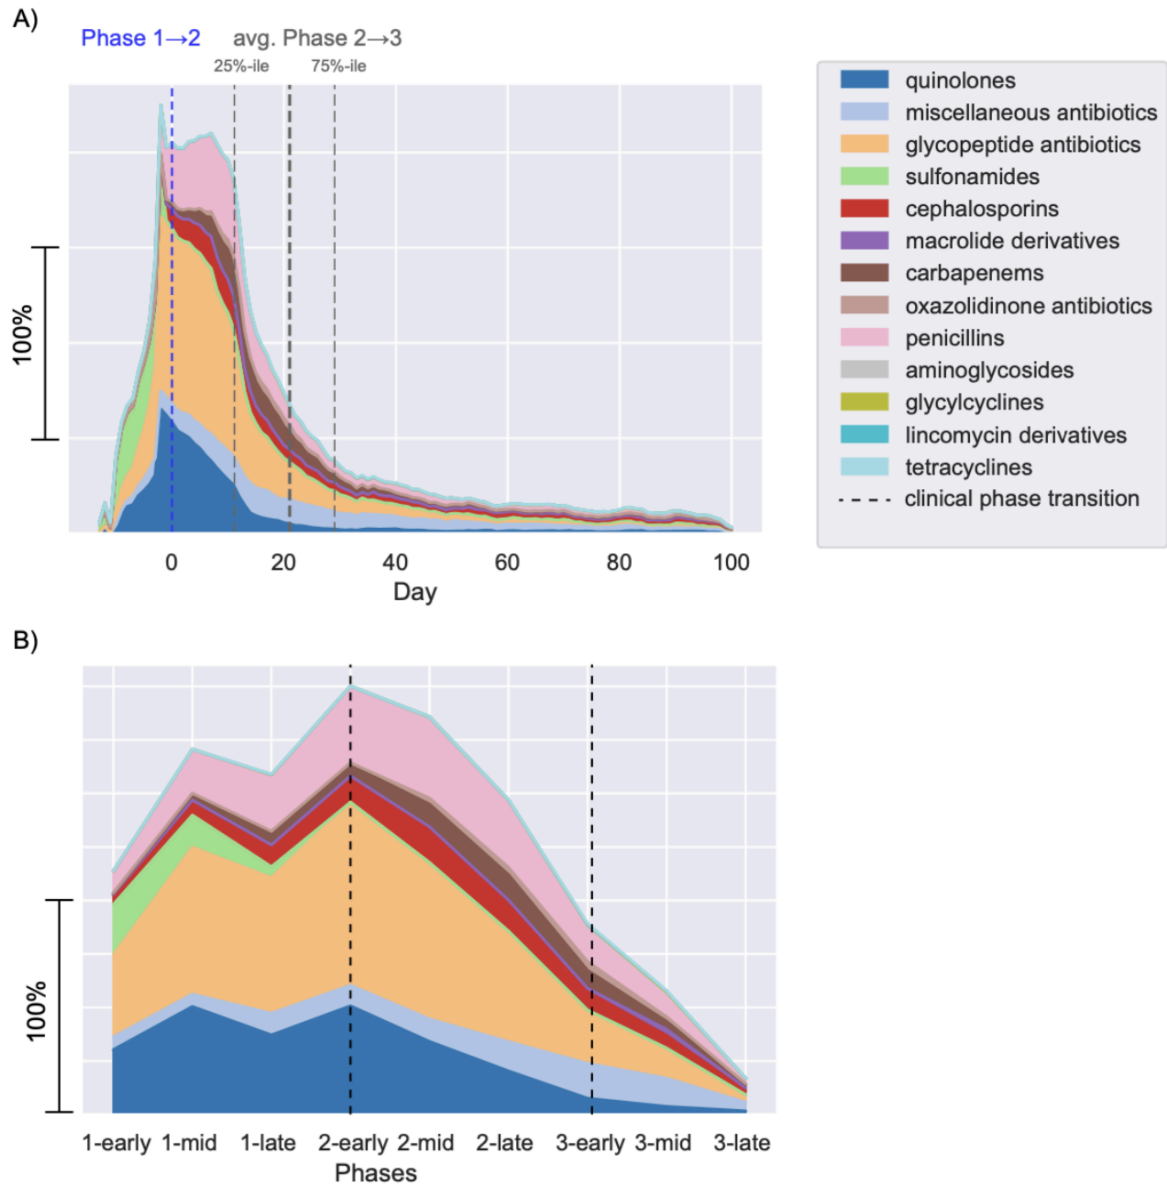

**Figure S4. Antibiotic administration exposures. Related to Methods.** Over time (A) and in the time bins representing distinct therapy phases as pseudotime (B); dashed vertical lines represent the transition timepoints between clinical phases in days relative to stem cell transplantation (A) and in pseudotime (B).

by ASV level differences and:

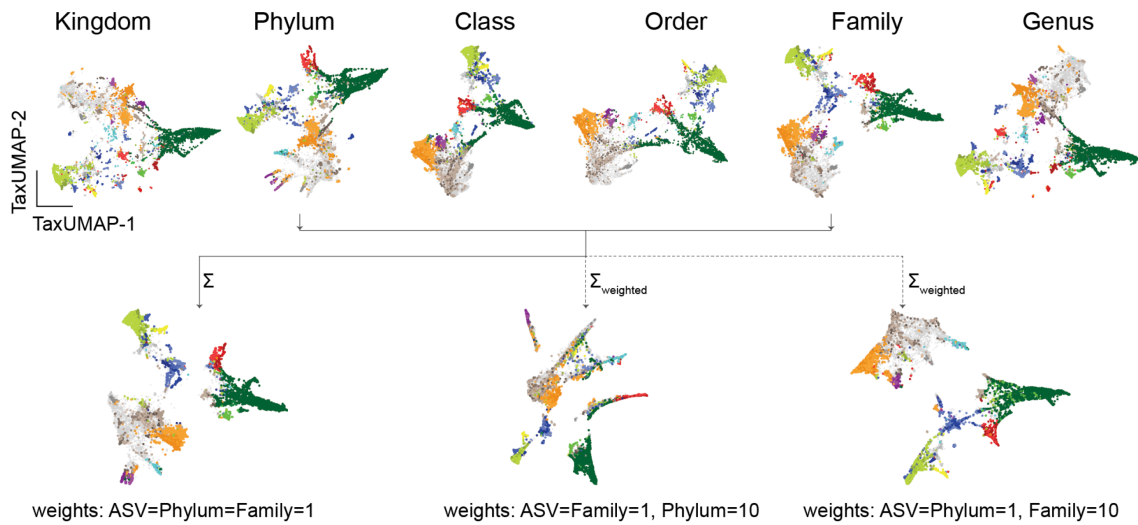

**Figure S5. Different TaxUMAP parameter choices. Related to Methods.** In addition to sample-by-sample distances based upon ASV level differences (naïve UMAP), the indicated taxonomic level was included in the sample-by-sample distance estimation (top row). Multiple levels may be combined; in the main text, we combined Phylum and Family with equal weights (bottom row, left). Increased weights for Phylum (middle) or Family (right) accentuate corresponding compositional features of the measured microbial compositions in a sample.



| Isolate ID (as in Figure 4 and Figure S2) | ASV                       | Sample ID | Patient ID | BioProject  | Accession Isolate |
|-------------------------------------------|---------------------------|-----------|------------|-------------|-------------------|
| AD9                                       | ASV-36- <i>Klebsiella</i> | FMT.0009U | FMT.0009   | PRJNA545312 | SRR14131380       |
| AD10                                      | ASV-36- <i>Klebsiella</i> | FMT.0009U | FMT.0009   | PRJNA545312 | SRR14131379       |
| AD11                                      | ASV-36- <i>Klebsiella</i> | FMT.0009U | FMT.0009   | PRJNA545312 | SRR14131378       |
| AD12                                      | ASV-36- <i>Klebsiella</i> | FMT.0009U | FMT.0009   | PRJNA545312 | SRR14131376       |
| AD24                                      | ASV-3- <i>E. coli</i>     | 745A      | 745        | PRJNA606262 | SRR14131383       |
| AD25                                      | ASV-3- <i>E. coli</i>     | 745A      | 745        | PRJNA606262 | SRR14131382       |
| AD26                                      | ASV-3- <i>E. coli</i>     | 745A      | 745        | PRJNA606262 | SRR14131381       |
| AD30                                      | ASV-36- <i>Klebsiella</i> | 149D      | 149        | PRJNA545312 | SRR14131374       |
| AD31                                      | ASV-36- <i>Klebsiella</i> | 149D      | 149        | PRJNA545312 | SRR14131373       |
| AD32                                      | ASV-36- <i>Klebsiella</i> | 149D      | 149        | PRJNA545312 | SRR14131372       |
| AD33                                      | ASV-36- <i>Klebsiella</i> | 729E      | 729        | PRJNA545312 | SRR14131389       |
| AD34                                      | ASV-36- <i>Klebsiella</i> | 729E      | 729        | PRJNA545312 | SRR14131387       |
| AD35                                      | ASV-36- <i>Klebsiella</i> | 729E      | 729        | PRJNA545312 | SRR14131386       |
| AD36                                      | ASV-36- <i>Klebsiella</i> | 729E      | 729        | PRJNA545312 | SRR14131385       |
| AD37                                      | ASV-36- <i>Klebsiella</i> | 729E      | 729        | PRJNA545312 | SRR14131384       |
| AD38                                      | ASV-36- <i>Klebsiella</i> | 1392M     | 1392       | PRJNA545312 | SRR14131400       |
| AD39                                      | ASV-36- <i>Klebsiella</i> | 1392M     | 1392       | PRJNA545312 | SRR14131399       |
| AD40                                      | ASV-36- <i>Klebsiella</i> | 1392M     | 1392       | PRJNA545312 | SRR14131388       |
| AD41                                      | ASV-36- <i>Klebsiella</i> | 1392M     | 1392       | PRJNA545312 | SRR14131377       |
| AD42                                      | ASV-36- <i>Klebsiella</i> | 1392M     | 1392       | PRJNA545312 | SRR14131375       |
| AD48                                      | ASV-3- <i>E. coli</i>     | 1814W     | 1814       | PRJNA607574 | SRR16077561       |
| AD49                                      | ASV-3- <i>E. coli</i>     | 1814W     | 1814       | PRJNA607574 | SRR16077560       |

**Table S1. The list of all ASV-3-*E. coli* and ASV-36-*Klebsiella* isolates used in this study and their NCBI accession numbers (“Accession Isolate” column). Related to Figure 4 and Figure S2.**

|                              | Coef.  | Std.Err. | z      | P> z  | [0.025 | 0.975] |
|------------------------------|--------|----------|--------|-------|--------|--------|
| Intercept                    | 8.264  | 0.205    | 40.388 | 0     | 7.863  | 8.665  |
| mix==True                    | -0.744 | 0.289    | -2.572 | 0.01  | -1.311 | -0.177 |
| ASV==ASV3                    | 0.48   | 0.289    | 1.658  | 0.097 | -0.087 | 1.047  |
| mix==True:ASV==ASV3          | 0.462  | 0.372    | 1.241  | 0.214 | -0.267 | 1.19   |
| Time                         | -0.045 | 0.01     | -4.535 | 0     | -0.064 | -0.026 |
| mix==True:Time               | 0.041  | 0.014    | 2.961  | 0.003 | 0.014  | 0.069  |
| Time:ASV==ASV3               | -0.033 | 0.014    | -2.383 | 0.017 | -0.061 | -0.006 |
| mix==True:Time:ASV==<br>ASV3 | -0.037 | 0.02     | -1.879 | 0.06  | -0.076 | 0.002  |
| Group Var                    | 0.073  | 0.104    |        |       |        |        |

**Table S4. Model summary results of *in vivo* experiment analyses. Related to Methods.**

| antibiotic category       | days administered per patient | Phase    |          |          |
|---------------------------|-------------------------------|----------|----------|----------|
|                           |                               | 1        | 2        | 3        |
| aminoglycosides           | mean                          | 0.050524 | 0.108803 | 0.028634 |
|                           | std                           | 0.597643 | 0.803477 | 0.246822 |
| carbapenems               | mean                          | 0.876072 | 2.115727 | 1.572687 |
|                           | std                           | 3.312291 | 4.971947 | 4.643664 |
| cephalosporins            | mean                          | 1.177312 | 2.143422 | 1.829295 |
|                           | std                           | 3.236395 | 4.415567 | 4.722806 |
| glycopeptide antibiotics  | mean                          | 7.711153 | 10.69535 | 4.044053 |
|                           | std                           | 6.305629 | 7.476178 | 6.725049 |
| glycylcyclines            | mean                          | 0.026692 | 0.038576 | 0.024229 |
|                           | std                           | 0.501194 | 0.522272 | 0.524449 |
| lincomycin derivatives    | mean                          | 0.055291 | 0.016815 | 0.085903 |
|                           | std                           | 1.3123   | 0.260833 | 1.393519 |
| macrolide derivatives     | mean                          | 0.171592 | 0.271019 | 1.068282 |
|                           | std                           | 1.319667 | 2.046427 | 4.616705 |
| miscellaneous antibiotics | mean                          | 1.734986 | 2.6182   | 4.394273 |
|                           | std                           | 4.631901 | 5.221493 | 8.721392 |
| oxazolidinone antibiotics | mean                          | 0.222116 | 0.723046 | 0.632159 |
|                           | std                           | 1.385326 | 2.749699 | 2.432131 |
| penicillins               | mean                          | 3.062917 | 5.443126 | 3.114537 |
|                           | std                           | 4.952816 | 6.662997 | 6.33397  |
| quinolones                | mean                          | 4.125834 | 4.757666 | 1.39207  |
|                           | std                           | 4.220699 | 6.005907 | 3.378123 |
| sulfonamides              | mean                          | 1.35939  | 0.09001  | 0.375551 |
|                           | std                           | 2.539292 | 1.028702 | 2.250796 |
| tetracyclines             | mean                          | 0.019066 | 0.007913 | 0.035242 |
|                           | std                           | 0.407022 | 0.160249 | 0.410545 |

**Table S5. Antibiotic administration exposure in three clinical phases. Related to Methods.**
